# Supplementary material for: Ciliary Neurotrophic Factor Derived From Astrocytes Protects Retinal Ganglion Cells Through PI3K/AKT, JAK/STAT, and MAPK/ERK Pathways
Source: PubMed Central journal article supplement (PMC9363680; doi:10.1167/iovs.63.9.4), 2022-08-04
Supplement: iovs-63-9-4_s001.pdf [file iovs-63-9-4_s001.pdf]

## Supplementary materials

### Figures

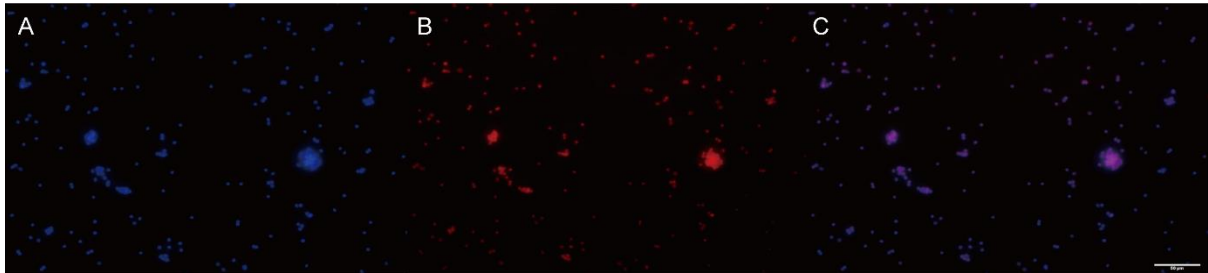

Supplemental Figure 1. Immunofluorescence of primary retinal ganglion cells (RGCs) at day 2 of culture shows positive expression of BRn3a (B). DAPI nuclear staining is shown in (A) and in the merged image in (C). Scale bar, 50  $\mu\text{m}$ .

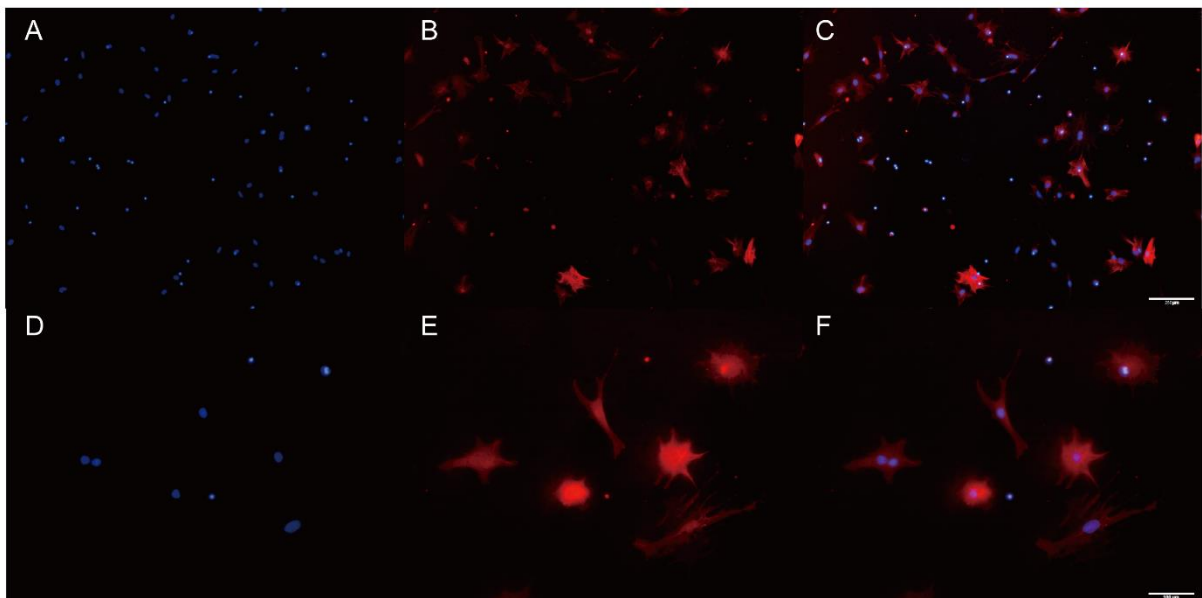

Supplemental Figure 2. Immunofluorescence of astrocytes at day 2 of culture shows positive expression of GFAP (B and E). DAPI nuclear staining is shown in (A and D) and in the merged images in (C and F). A-C: Scale bar, 250  $\mu\text{m}$ ; D-F: Scale bar, 100  $\mu\text{m}$ .

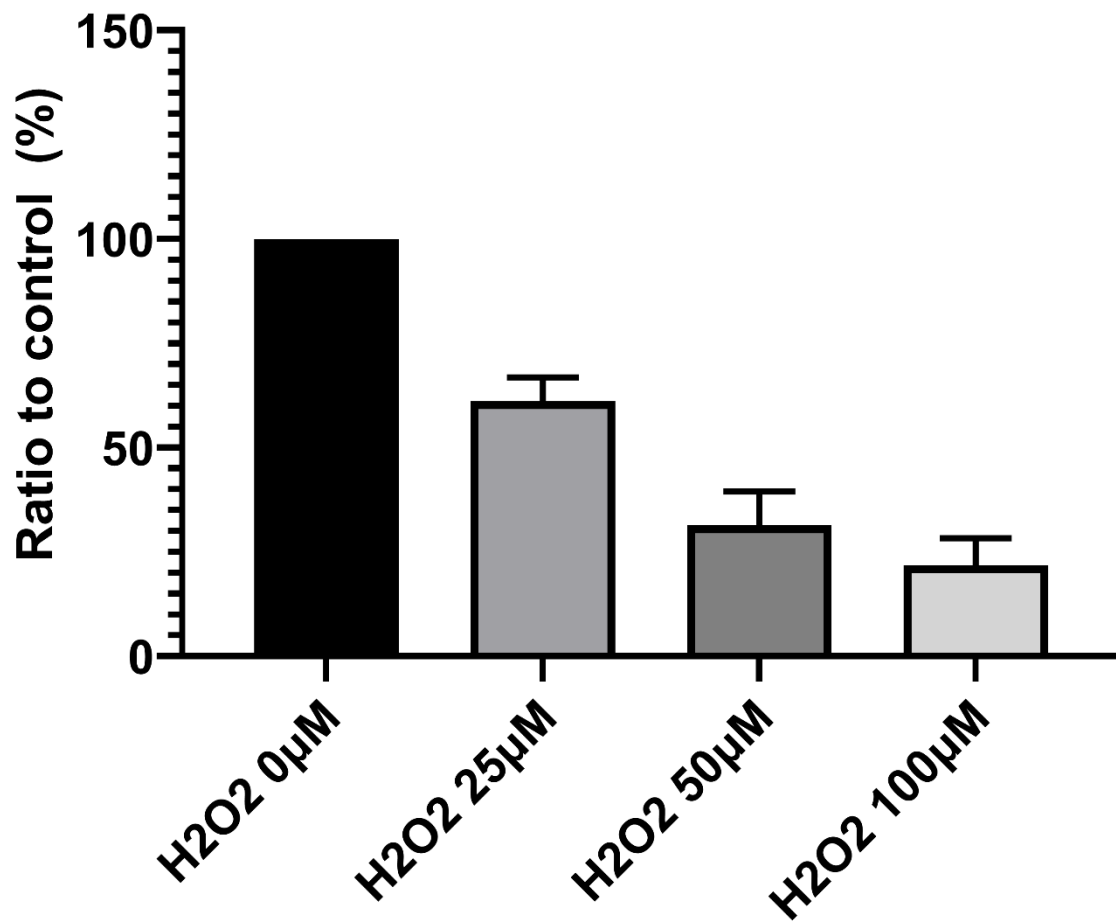

Supplemental Figure 3. Results of cell counting. Primary mouse retinal ganglion cells (RGCs) were exposed to oxidative stress induced by hydrogen peroxide (H<sub>2</sub>O<sub>2</sub>) for up to 24 hours. The number of DAPI stained-RGCs was decreased in a dose-dependent manner. Data in the columns indicate the mean  $\pm$  SD of three experiments.
